# Supplementary material for: 11β-Hydroxysteroid dehydrogenase blockade prevents age-induced skin structure and function defects
Source: JCI journal article supplement (doi:10.1172/jci64162), 2013-06-02
Supplement: sd1 [file 1]

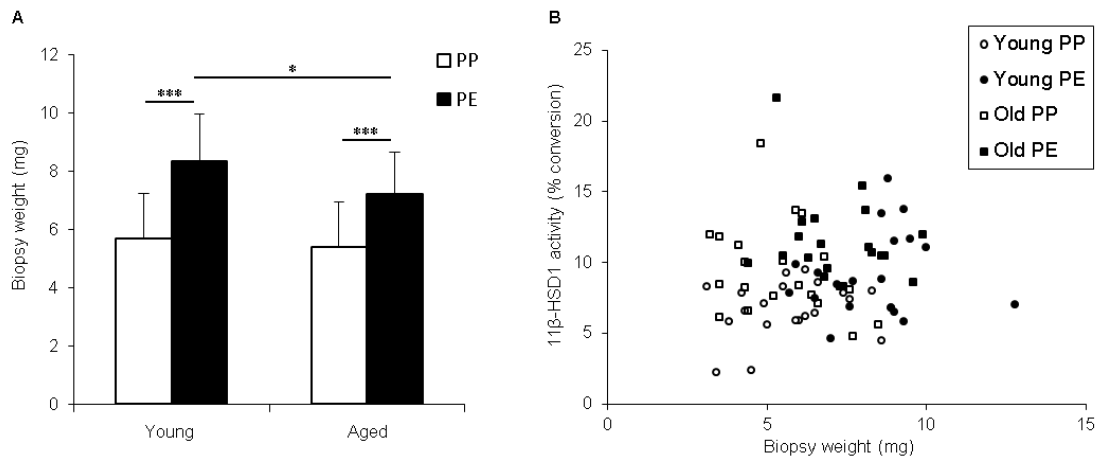

**Supplementary 1: Increased tissue weight in PE samples does not correlate with increased 11β-HSD1 activity. (A)** Biopsy weight (mg) was greater in PE vs. PP human skin from both young (n=20) and older (n=20) donors. Moreover, weight was decreased in PE biopsies from older vs. younger donors. **(B)** No correlation between tissue weight and corresponding 11β-HSD1 (oxoreductase) % conversion of cortisone to cortisol was observed for PE or PP samples in either age group. Significance \* =  $p < 0.05$ , \*\*\* =  $p < 0.001$ .

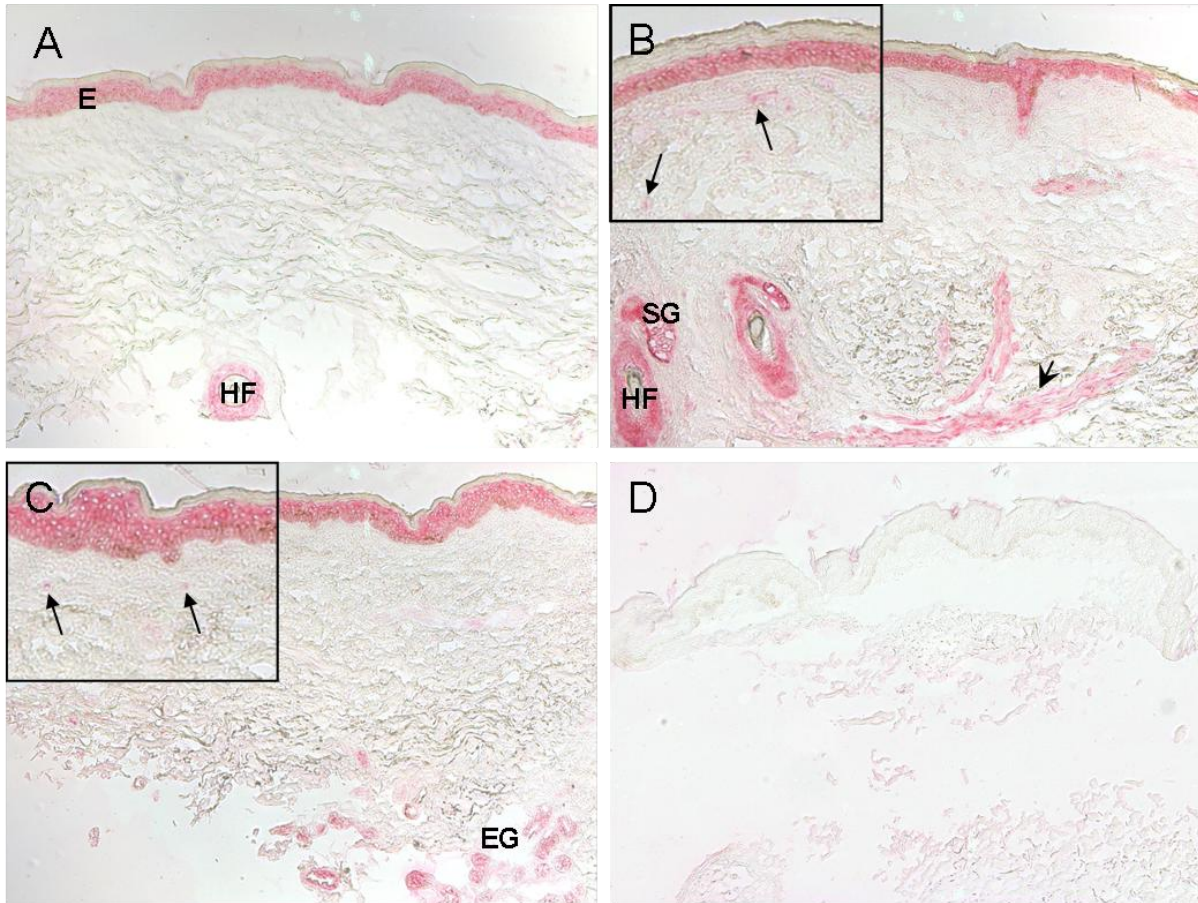

**Supplementary 2: Monoclonal 11 $\beta$ -HSD1 antibody validation.** (A, B, C) Positive staining was detected in epidermal keratinocytes (E), dermal fibroblasts (arrows, inset) and microvasculature (arrowhead). Staining was also detected in hair follicles (HF), eccrine sweat glands (EG,) and sebaceous glands (SG). (D) Negligible staining was observed in equimolar isotype control-treated sections. Sections at 10X magnification
